## Optogenetic Control of RhoA Reveals Zyxin-mediated Elasticity of Stress Fibers

Patrick W. Oakes<sup>1,4\*^</sup>, Elizabeth Wagner<sup>2\*</sup>, Christoph A. Brand<sup>3+</sup>, Dimitri Probst<sup>3+</sup>, Marco Linke<sup>3+</sup>, Ulrich S. Schwarz<sup>3^</sup>, Michael Glotzer<sup>2^</sup>, Margaret L. Gardel<sup>1^</sup>

<sup>1</sup>Institute for Biophysical Dynamics, James Franck Institute and the Department of Physics, University of Chicago, Chicago, IL 606037

<sup>2</sup>Department of Molecular Genetics and Cell Biology, University of Chicago, Chicago, IL 60637

<sup>3</sup>Institute for Theoretical Physics and BioQuant, Heidelberg University, Heidelberg, Germany

<sup>4</sup>Department of Physics & Astronomy, and Department of Biology, University of Rochester, Rochester, NY 14627

\*,+Contributed equally

^Corresponding Authors

## 1 **Abstract**

2 The mechanics of the actin cytoskeleton regulates cell morphogenesis during essential physiological  
3 processes. While cellular contractility is known to be largely RhoA-dependent, the process by which  
4 localized biochemical signals are translated into cell-level responses is not well understood. Here we  
5 combine optogenetic control of RhoA in space and time, live cell imaging and traction force microscopy  
6 to investigate the dynamics of actomyosin-based force generation in adherent fibroblasts. Local  
7 activation of RhoA not only stimulates local recruitment of actin and myosin, but also leads to  
8 increased traction forces outside the activation region that rapidly propagate across the cell via stress  
9 fibers and drive actin flow towards the region of heightened RhoA. Surprisingly, the flow reverses  
10 direction when local RhoA activation stops. We identify zyxin as a regulator of stress fiber mechanics,  
11 as stress fibers are fluid-like without flow reversal in its absence. These experimental data are used to  
12 constrain a physical model, which demonstrates that stress fibers are elastic-like, even at time scales  
13 exceeding turnover of constituent proteins. Such molecular control of actin mechanics likely plays  
14 critical roles in regulation of morphogenic events.

15

## 16 **Introduction**

17 A diverse array of essential physiological processes, ranging from the subcellular to the multicellular,  
18 depend on the spatial and temporal regulation of contractile forces<sup>1-4</sup>. This regulation drives changes in  
19 cell shape<sup>5,6</sup> and mediates interactions with the extracellular environment<sup>7,8</sup>. Changes in contractility  
20 can furthermore alter gene expression<sup>9</sup> and impact development<sup>10,11</sup>. The molecular machinery  
21 required for generating contractile forces is well conserved and dominated by the actin cytoskeleton,  
22 myosin II activity and associated regulatory proteins<sup>4,12,13</sup>. Specifically, actin filaments dynamically  
23 organize into distinct contractile architectures, including the cortex and stress fibers<sup>14,15</sup>. Contractile  
24 forces are transmitted across the cell by actin arrays and ultimately to the extracellular matrix by focal  
25 adhesions<sup>12,13,16,17</sup>.

26

27 The regulation of cellular force transmission is controlled by the mechanical properties of actomyosin  
28 assemblies. Cellular mechanics has been explored extensively both experimentally<sup>14,18-20</sup> and  
29 theoretically<sup>21-23</sup>. The current understanding is that, at time scales up to those of typical kinetic

30 processes, the actin cytoskeleton behaves like an elastic solid. Such elasticity enables rapid force  
31 transmission across the cell and reversible deformations to preserve cytoskeletal architecture. In  
32 contrast, at longer time scales, it is thought that dynamic processes make the cytoskeleton  
33 predominately like a viscous fluid, enabling cytoskeletal flows and remodeling. These dynamic  
34 processes including exchange of proteins from the cytosol and are typically on the order of tens of  
35 seconds in structures like the cortex<sup>24,25</sup> and on the order of a minute in stress fibers<sup>26</sup>. The molecular  
36 regulation underlying the competition between elastic and viscous processes in cells is not well  
37 understood.

38  
39 Cellular contractility is largely controlled by the activity of the small GTPase RhoA<sup>27,28</sup>, which in  
40 adherent cells is preferentially active at the cell periphery<sup>29,30</sup>. RhoA regulates contractility through the  
41 promotion of actin polymerization and myosin light chain phosphorylation via the downstream  
42 effectors Diaphanous-related formins and Rho-associated Kinase (ROCK), respectively. RhoA activity is  
43 required for stress fibers and focal adhesions<sup>27,28</sup>. Little, however, is known about how small changes in  
44 activity can regulate cell contractility, actin architecture and adhesion.

45  
46 Optogenetics has been used before to control cell migration and cell forces<sup>31-34</sup>. Here we have used an  
47 optogenetic probe to locally activate RhoA in adherent fibroblasts. Plasma membrane recruitment of  
48 the RhoA specific guanine exchange factor (GEF) LARG induces local RhoA activation<sup>6,35-37</sup>. Local  
49 activation of RhoA leads to an increase in actin polymerization and myosin activity in the region of  
50 activation, but it does not stimulate *de novo* stress fiber formation or changes in focal adhesion  
51 morphology. We find that exogenous RhoA activation leads to an immediate increase in both the local  
52 and global contractility of the cell, followed by a rapid relaxation after GEF recruitment is stopped. The  
53 local increase in stress fiber contractility drives an actomyosin flow towards regions of increased RhoA  
54 activity. Surprisingly, these flows reverse direction as soon as GEF recruitment ceases. Using physical  
55 modeling, we show this behavior is consistent with stress fibers behaving as predominately elastic-like  
56 over time scales much longer than minutes. We find that zyxin is necessary for this elasticity; in its  
57 absence, stress fibers become predominately fluid-like even at second time scales. These results

58 suggest that stress fiber mechanics is sensitive to small changes in composition, which has significant  
59 implications for regulation of force transmission and cytoskeletal organization.

60

## 61 **Results**

### 62 **Spatiotemporal control of RhoA and its downstream effectors**

63 To spatially and temporally control contractility in adherent cells, we adapted a previously established  
64 optogenetic probe<sup>6,35</sup> to act on the RhoA signaling pathway (Figure 1a). During stimulation by blue  
65 light, a cytosolic fusion protein, photo-recruitable GEF (prGEF), consisting of tandem PDZ domains  
66 fused to the DH domain of the RhoA specific GEF LARG<sup>6</sup>, is recruited to the plasma membrane where it  
67 activates RhoA (Figure 1b). To illustrate the local recruitment of prGEF we tagged it with the  
68 fluorophore mCherry and imaged an NIH 3T3 fibroblast expressing the constructs on a glass coverslip  
69 (Figure 1c). A digital micromirror device was used to spatially control the illumination of the blue  
70 activating light (orange box, Figure 1c), and was pulsed before each image acquisition during the  
71 recruitment period. Recruitment of the prGEF to the activation region was rapid and reversible upon  
72 extinguishing the stimulating blue light (Figure 1c,d and Supplementary Movie 1).

73

74 To investigate whether recruitment of the prGEF resulted in activity of proteins downstream of RhoA,  
75 we tracked the dynamics of actin and myosin light chain (MLC) during recruitment (Figure 1e-g). Both  
76 actin and myosin accumulated in the activation regions, resulting in an increase in fluorescence  
77 intensity during the 15 min activation period (Figure 1e-g and Supplementary Movies 2-3).

78 Interestingly, local activation of RhoA did not lead to *de novo* stress fiber assembly in the activation  
79 region (Figure 1e and Supplementary Movie 2). At the end of the activation period, fluorescence  
80 intensities of both actin and myosin returned to baseline levels. These results indicate that exogenous  
81 RhoA activation via LARG recruitment is not sufficient to maintain elevated RhoA activity and the  
82 concomitant increases in local actin and myosin concentrations. To confirm that local activation of  
83 RhoA was acting on actin and myosin through its downstream effectors, formin and ROCK, the  
84 experiments were repeated in the presence of either SMIFH2, a pan formin inhibitor<sup>38</sup>, or Y-27632, a  
85 Rho-associated Kinase inhibitor (Figure 1h). Local recruitment of actin and MLC were significantly  
86 inhibited by the presence of SMIFH2 and Y-27632, respectively. These results illustrate that RhoA

87 activity and recruitment of its downstream effectors can be spatially and temporally controlled via  
88 light.

89

### 90 **Adhesion morphology is unperturbed by local RhoA activity**

91 Previous work has suggested that focal adhesion formation and maturation are tension dependent  
92 processes driven by increased RhoA activity at adhesion sites<sup>27,28,39</sup>. To test these hypotheses we  
93 examined how local RhoA activation affected traction forces and focal adhesions. Cells expressing  
94 mCherry-vinculin, a marker of focal adhesions, were plated on polyacrylamide gels coated with  
95 fibronectin and traction stresses were measured via Traction Force Microscopy (Figure 2a,b and  
96 Supplementary Movie 4)<sup>40,41</sup>. During local activation of RhoA, traction stresses increased at focal  
97 adhesion sites, on a similar timescale to that of myosin localization (Figure 1g). Despite the increased  
98 force, the total number of adhesions remained essentially constant (Figure 2c). Individual adhesion  
99 morphology and vinculin intensity were also unaffected, despite large increases in stress at a majority  
100 of previously established adhesion sites during local RhoA activation (Figure 2d & Supplementary Fig.  
101 S1). Too much illumination, however, results in adhesion failure and detachment from the substrate  
102 (Supplementary Fig. S2). As the adhesions and stress fibers are fully formed already in these cells, the  
103 lack of change in adhesion morphology is consistent with previous results showing that adhesion size  
104 and tension are correlated during the initial growth phase of the adhesion<sup>42</sup>, and that adhesion  
105 maturation is driven by proximal actin stress fiber assembly<sup>43</sup>.

106

107 To determine the effect of local RhoA activation on the overall contractility of the cell, we used traction  
108 force microscopy to measure the total strain energy, which reflects the amount of mechanical work  
109 done by the cell on its environment<sup>44</sup>. Activation induced a rapid increase in both traction stresses and  
110 strain energy (Figure 2b,c). At the end of the activation period, the strain energy decreased to their  
111 original baseline values (Figure 2c). Interestingly, traction stresses were mostly seen to increase at the  
112 cell periphery, where traction stresses were already established, and in areas immediately adjacent to  
113 the activation region. No change was seen in the activation area itself (Figure 2b). This suggests that  
114 locally generated forces balance within the activation region and only unbalanced forces at the edge of

115 this region are turned into productive traction forces. Thus, a local increase of tension leads to globally  
116 distributed traction forces at pre-existing focal adhesions.

117

### 118 **Cells maintain a contractile set point**

119 That cells return to a similar baseline contractility following a period of exogenous RhoA activation is  
120 consistent with previously established ideas of tensional homeostasis<sup>44-47</sup>. To explicitly probe this  
121 behavior, we performed a series of local activations of different sizes on a single cell (Figure 2e and  
122 Supplementary Movie 5). After measuring the strain energy at an initial steady state, a cell was  
123 exposed to three 15 min periods of local RhoA activation of increasing size with relaxation periods  
124 between each activation (Figure 2e,f). The strain energy increased concomitant with the size of the  
125 activation region. During activation, both local stresses immediately surrounding the activation region,  
126 and long-range stresses at the cell periphery could be seen to increase (Figure 2e). Following each  
127 activation, the strain energy returned to the initial baseline level (Figure 2f).

128

129 To elucidate the underlying mechanical principles, we built a physical model that would capture this  
130 physical response. We constructed a model of the cell as a continuum of contractile elements in series,  
131 each with one elastic and one viscous element in parallel (Figure 2g). Such a model is known as an  
132 “active Maxwell fluid” and is used here because we are interested in long time scales, when the system  
133 is expected to flow<sup>21,25,48</sup>. Contractility was assumed to increase with an exponentially plateauing ramp  
134 in the activated region, consistent with the observed accumulation profiles for actin and myosin  
135 (Figure 1g), and the substrate was represented as an elastic spring coupled to the cell by a friction  
136 element. The model parameters for the elastic modulus, viscosity, friction and contractility were found  
137 by fitting the model to the strain energy data, while the value of the substrate stiffness was fixed. This  
138 procedure resulted in a curve in good agreement with the experimental data (Figure 2f).

139

140 We find that both the viscous and elastic elements are necessary to accurately capture the behavior of  
141 the system over the whole time course of ramping, plateau and relaxation. The ratio of viscosity to  
142 elasticity defines a viscoelastic relaxation time of approximately 60 minutes; this time scale determines  
143 the transition from when the cytoskeleton behaves predominately elastic-like (< 60 min) to

144 predominately fluid-like (> 60 min). Our results thus indicate that stress fibers are predominantly  
145 elastic on the scale of tens of minutes, despite proteins within the stress fiber turning over on  
146 timescales of tens of seconds<sup>15</sup>. This strong elastic behavior is also consistent with the immediate  
147 increase in cell traction stresses at the cell periphery (Figure 2b,e) upon local activation of RhoA in the  
148 center of the cell.

### 149 150 **Stress fibers contract independent of the background network**

151 To investigate the cytoskeletal architectures that give rise to this strong contractility, we tracked  
152 myosin dynamics during local RhoA activation. In the steady state, as new actomyosin is polymerized  
153 and incorporated into stress fibers, there is a retrograde flow of actomyosin from the periphery  
154 towards the cell center<sup>15,17</sup>. Using particle image velocimetry (PIV)<sup>49,50</sup> we measured both the local  
155 direction and magnitude of myosin flow. We found that myosin flow rates along the stress fiber  
156 increased as myosin accumulated in the activation region creating a local contraction, and that this  
157 flow was directed along the orientation of the stress fibers spanning the activation region (Figure 3a,b,  
158 Supplementary Fig. S3, and Supplementary Movie 6). The flow direction was independent of the  
159 activation region geometry, with the direction always being determined by the stress fiber orientation  
160 (Supplementary Movie 7).

161  
162 The cytoskeleton of a strongly adherent cell is typically thought to be a 2D material comprised of stress  
163 fibers embedded in an isotropic cortex<sup>41,51,52</sup>. Since flows induced by local RhoA activation appear to  
164 track the orientation of the stress fibers (Figs. 3a,b and S2), we sought to address the relative  
165 contractile contributions of the stress fibers and the actin networks. We therefore built a 2D discrete  
166 model analogous to the 1D continuum model described above (Figure 3c). The model consists of a  
167 triangular mesh with the contractile elements again connected in parallel to the viscous and elastic  
168 elements, with lines of increased contractility representing the stress fibers. Using a simple rectangular  
169 cell, we first verified that, without stress fibers, this model recapitulates the results from the one-  
170 dimensional continuum model (Figure 3d). Similar to the 1D model above, the contractile components  
171 in a region in the center of the cell were slowly increased with an exponentially plateauing ramp. The

172 parameters were then adjusted so that the model both qualitatively and quantitatively recapitulated  
173 the expected flow patterns of the 1D continuum model (Figure 3d).

174

175 To explore the relative contributions of the background mesh and the stress fibers, we considered two  
176 test cases: (1) If both the mesh and the stress fibers contained contractile elements, the stress fibers  
177 pinched inward transverse to their orientation during local activation (Figure 3e); and (2) when  
178 contractile elements were only included in the stress fibers (as depicted in Figure 3c), the cytoskeletal  
179 flow was restricted to directions along the stress fiber (Figure 3f), consistent with our experimental  
180 results (Figure 3a-b, Supplementary Fig. S3, and Supplementary Movies 6-7). Since transverse  
181 deformations were never seen in experiments, it is clear that the stress fibers must be the  
182 predominant contractile elements observable at this resolution which respond to local RhoA-induced  
183 contractions. Furthermore, this result illustrates that it is appropriate to think of a stress fiber as a one-  
184 dimensional contractile element with viscous and elastic components embedded in a passive  
185 viscoelastic network.

186

### 187 **Stress fibers flow due to local RhoA induced strain**

188 Having identified the stress fiber as the main contractile unit responding to exogenous RhoA activation,  
189 we next sought to address whether stress fibers undergo deformation during contraction. Since stress  
190 fibers can be considered as 1D structures, we analyzed myosin flow along the fiber using kymographs.  
191 A kymograph drawn along a single stress fiber illustrates that myosin puncta flowed from both ends  
192 towards the activation regions when RhoA was activated locally (Figure 4a-b, Supplementary Fig. S5).  
193 Similarly, a kymograph drawn by projecting the flow speed along the stress fiber from the velocity field  
194 created by our PIV analysis illustrates even more clearly how cytoskeletal flow was perturbed by local  
195 RhoA activation. Flow of myosin from both ends of the stress fiber reoriented towards the recruitment  
196 regions and increased from  $\sim 1$  nm/s on average to more than 3 nm/s during activation (Figure 4c and  
197 Supplementary Fig. S5). Strikingly, the flow was also seen to reverse direction, flowing away from the  
198 recruitment region and towards the cell periphery, during the relaxation period following the local  
199 activation (Figure 4b,c). This flow reversal is reminiscent of the restoring force in elastic objects that  
200 restores its original shape after removal of external force (e.g. recoil of an elastic band after stretch). In



201 active systems, flow reversal could also arise from spatial variations in tension. Specifically, this would  
202 either require the myosin stress within the activation region to fall below its pre-activation level or  
203 increased myosin activity distal to the activation site. However, we do not observe such changes in  
204 actomyosin density, indicating a passive elastic-like element may be sufficient in describing this recoil.  
205

206 We next developed a protocol to measure the magnitude of the stress fiber displacement during these  
207 periods of contraction and relaxation (Figure 4d). The displacement in a given fiber was determined by  
208 measuring the relative position of puncta along the fiber following 15 minutes of local RhoA activation  
209 and 15 minutes after it ceased. During contraction, puncta on either side of the activation region  
210 contracted on average  $\sim 3 \mu\text{m}$  from their original position before relaxing back to  $\sim 1 \mu\text{m}$  from their  
211 original position (Figure 4d). The relaxation response across many stress fibers from multiple cells  
212 could be further clustered into two groups, one which exhibited strong reversal ( $\sim 80\%$  of the original  
213 position) and one which exhibited little to no reversal ( $\sim 25\%$  of the original position) (Figure 4d).

214  
215 To determine whether stress fibers were stretching due to the local contraction, we used cells  
216 expressing mApple- $\alpha$ -actinin, an actin crosslinker which localizes to well defined puncta on stress fibers  
217 (Figure 4e and Supplementary Movie 8). We created kymographs of  $\alpha$ -actinin flow during local  
218 activation of RhoA and tracked paths of individual puncta (Figure 4f). The velocity of individual puncta  
219 was determined from the slope of the tracks in the kymograph and plotted as a function of distance  
220 from the activation zone (Figure 4g). Puncta along the stress fiber moved at similar speeds, indicating  
221 that, in general, the stress fiber was translating as a rigid rod during the local contraction (Figure 4g).  
222 Where present, changes in velocity between neighboring puncta were abrupt (blue arrow Fig 4g),  
223 suggesting points of structural failure along a fiber. These results indicate that the strain induced in the  
224 stress fiber is restricted to the local contraction in the activation region and discrete sites of extension  
225 in regions outside the activation region.

226  
227 By fitting the experimental kymographs to both our 1D continuum and 2D discrete models, we show  
228 that similar flow patterns emerge naturally from the mechanics of the system (Figure 4h). The high  
229 elasticity of the stress fiber, specifically the ratio of elasticity to viscosity, is sufficient to recapitulate

230 the flow profiles that were seen during both RhoA activation and relaxation. Furthermore, the  
231 parameters found from the kymograph fitting process were consistent with the parameter values  
232 found when fitting the strain energy (Table 2).

233

### 234 **Zyxin is recruited to sites of strain on stress fibers**

235 In order to probe the underlying molecular basis of this elasticity, we sought to identify stress fiber-  
236 associated proteins that could contribute to the recoil behavior. Zyxin has been previously established  
237 as a mechanosensitive protein that dynamically localizes to sites of strain along stress fibers<sup>53,54</sup>, in  
238 addition to focal adhesions<sup>55</sup>. Using cells expressing mCherry-zyxin, we monitored zyxin activity during  
239 RhoA activation (Figure 5a and Supplementary Movie 9). Zyxin recruitment was consistently observed  
240 in a small population of focal adhesions outside of the local activation region (Figure 5b). Surprisingly,  
241 we found that zyxin also accumulated along stress fibers in the region of local activation (Figure 5c,d).  
242 Given the myosin accumulation and direction of flow, this suggests that zyxin might be recruited to  
243 both sites of compression and extension. Paxillin, another mechanosensitive LIM domain protein that  
244 responds to stress<sup>56,57</sup>, behaved similarly to zyxin (Supplementary Fig. S4).

245

### 246 **Zyxin is required for stress fibers to behave elastically**

247 To further explore the role of zyxin in stress fiber mechanical behavior we used mouse embryonic  
248 fibroblast cells derived from zyxin<sup>-/-</sup> mice<sup>58</sup>. Despite the loss of zyxin, these cells form actin stress fibers  
249 and focal adhesions and are highly contractile<sup>59</sup>. When we locally activated RhoA in the zyxin<sup>-/-</sup> cells,  
250 myosin accumulated in the activation region (Figure 5e and Supplementary Movie 10). This  
251 accumulation drove a contractile flow into the local activation area that was indistinguishable from  
252 wild type cells, indicating that loss of zyxin did not impede myosin activity. Upon stopping the GEF  
253 recruitment in zyxin<sup>-/-</sup> cells, cytoskeletal flow returned to pre-activation rates, consistent with the  
254 reduced local contraction, but did not reverse direction (Figure 5e-f,i, Supplementary Fig. S5, and  
255 Supplementary Movie 10). Expression of EGFP-zyxin in this cell line restored the flow reversal (Figure  
256 5g-i, Supplementary Fig. S5 and Supplementary Movie 11). Together these results indicate that zyxin is  
257 required for the flow reversal occurring after local RhoA activation ends.

258

259 Using the kymographs produced in the *zyxin*<sup>-/-</sup> and *zyxin*<sup>-/-</sup>+EGFP-*zyxin* cells, we again fit the data to our  
260 mechanical model (Figure 5j-l, Supplementary Fig. S6). For the *zyxin*<sup>-/-</sup> cells, we found the viscoelastic  
261 relaxation time reduced to 1 sec, indicating that the stress fibers are predominately fluid-like at all  
262 physiological time scales. Rescue of the *zyxin*<sup>-/-</sup> cells with EGFP-*zyxin* resulted in parameter fits that  
263 were consistent with the NIH 3T3 fibroblast data. Zyxin is thus important for maintaining the  
264 qualitative mechanical response of stress fibers, ensuring they are predominately elastic at ~1 hr time  
265 scales.

266

## 267 Discussion

268 This study demonstrates that the mechanical behavior of adherent cells is strongly shaped by stress  
269 fibers and their ability for rapid force transmission even in the face of molecular turnover and flow.  
270 Using an optogenetic probe to locally activate RhoA via recruitment of the DH domain of LARG, a RhoA  
271 specific GEF, we find that we can stimulate a local contraction in stress fibers due to an increased  
272 accumulation of actin and myosin in the activation area (Figure 6, 1). This local contraction causes a  
273 tension gradient at the boundaries of the activation region and a flow towards it (Figure 6, 2). The flow  
274 of myosin and  $\alpha$ -actinin increases the strain both on the interface coupling the stress fiber to the  
275 adhesion and in the activation region, leading to recruitment of the mechanosensitive protein zyxin  
276 (Figure 6, 3). When local activation of RhoA is stopped, the system relaxes to the pre-activation state,  
277 mainly driven by elastic energy accumulated in the strained regions, and results in a transient  
278 cytoskeletal flow of material away from the local activation region (Figure 6, 4).

279

280 This elastic behavior is dependent on zyxin. Previous reports have shown that zyxin localizes along the  
281 stress fiber at the interface of the adhesion<sup>60,61</sup>. This positioning suggests that previously reported  
282 zyxin mediated stress fiber repair mechanisms<sup>56,59</sup> are also occurring at the adhesion interface as actin  
283 is assembled and is incorporated into the stress fiber while under tension. The localization of zyxin to  
284 potential sites of compression, however, is novel. While it is known that the LIM domain of zyxin is  
285 sufficient for localization<sup>62</sup>, the exact mechanism through which zyxin recognizes sites of strain remains  
286 unknown.

287

288 These data further illustrate that RhoA activity and its downstream effectors are tightly regulated by  
289 the cell. We see no evidence that RhoA activation alone leads to *de novo* stress fiber formation or  
290 adhesion maturation. Instead these processes likely result from concurrent changes in cytoskeletal  
291 architecture<sup>43,63</sup>. More interestingly, the data suggest cells regulate total RhoA activity to maintain a  
292 constant homeostasis<sup>44-47</sup>. Specifically, the relaxation kinetics of the downstream effectors match the  
293 kinetics of the optogenetic probe<sup>35</sup>, thus indicating that there is no positive feedback loop whereby  
294 production of RhoA•GTP alone is sufficient to promote further activation of RhoA. To sustain a given  
295 contractile state, therefore, the cell must actively regulate and maintain a specific RhoA•GTP  
296 concentration.

297  
298 By using an optogenetic approach to perturb the local mechanical balance within the cell, we were  
299 able to probe the material properties of the cytoskeleton in ways previously inaccessible. It is  
300 instructive to consider our results within the context of other approaches that probe stress fiber  
301 mechanics. One such method is the cyclic stretch of an elastic substrate, in which Rho-activation is  
302 involved in reorienting the cell and its stress fibers away from the direction of stretch<sup>64</sup>. It has been  
303 argued that the reorientation response might result from a homeostatic set point, that is either  
304 passive<sup>65</sup> or active<sup>66</sup> in nature, which is consistent with our experimental results. Another interesting  
305 comparison can be made with severing of stress fibers via laser ablation<sup>53,67-69</sup>. In severing experiments,  
306 the mechanical stability of the fiber is compromised while myosin activity on the remaining portion  
307 remains unchanged, thus driving a large contraction over seconds. By contrast, we probe the response  
308 to small perturbations in tension along an intact stress fiber over tens of minutes. As a result of the  
309 differences between the two setups, these experiments are probing different types of stress fiber  
310 mechanical response. In contrast to severing experiments, where sarcomeres have been reported to  
311 collapse to a minimal length following a reduction in tension<sup>68</sup>, we do not see changes in the spacing of  
312 the sarcomeric structure of crosslinkers in the fiber during the increase in tension driven by local RhoA  
313 activation. Our experiments thus probe the homeostasis of the system, while severing probes the  
314 limits of stability. Interestingly, it has been reported previously that sarcomere size in stress fibers  
315 fluctuates on a 20 min time scale<sup>70</sup>, which might be related to the 50 min viscoelastic time scale

316 revealed by our model results. Future insights could be derived from fluctuation analysis during  
317 optogenetic activation.

318

319 Contraction is driven by the local accumulation of myosin in the region of activation, but the origin of  
320 the elastic-like recovery is less clear. We see no evidence of additional myosin accumulation in distal  
321 portions of the stress fiber during the relaxation, suggesting that the recoil arises from zyxin-mediated  
322 repair mechanisms within stress fibers. This is further supported by the fact that the zyxin<sup>-/-</sup> cells  
323 exhibit identical contractile behavior, but none of the elastic recoil. Zyxin is known to recruit actin  
324 polymerization factors like VASP and actin crosslinkers like alpha-actinin<sup>59</sup> and these interactions might  
325 be essential to ensure mechanical integrity of stress fibers. The molecular detail of these protein  
326 interactions under applied load remains an outstanding question.

327

328 Our experiments highlight the importance of defining the relevant timescales and perturbations when  
329 describing a material as elastic or viscous. Given that typical turnover rates for proteins in the  
330 cytoskeleton are on the order of tens of seconds<sup>15,25,26</sup>, it is surprising that our model results suggest  
331 that stress fibers have elastic-like properties on timescales of ~1 hour. The viscous behavior of cells is  
332 typically associated with irreversible changes brought on through remodeling and dynamic activity of  
333 proteins (e.g. cytoskeletal remodeling during migration)<sup>21,71</sup>. This has informed much of the active fluid  
334 theoretical frameworks that have been developed<sup>21</sup>. Conversely, elasticity has typically been used to  
335 describe cellular material properties without consideration of the dynamic activity of the  
336 components<sup>44,72,73</sup> and has been used in understanding force generation<sup>44</sup> and mechanosensing<sup>74</sup>. Our  
337 results suggest that active remodeling within the cytoskeleton can result in elastic-like properties of  
338 time scales exceeding those of dynamics of internal components. Moreover, our results indicate that  
339 very different viscoelastic time scales might co-exist in the same cell and even in the same cytoskeletal  
340 structures. Finally, our results implicate an important role for zyxin in regulating transitions between  
341 fluid-like and elastic-like behaviors. This has exciting implications for interpreting the underlying  
342 physics of active cytoskeletal materials. The fact that this behavior can be controlled by the activity of a  
343 single protein suggests intriguing potential mechanisms cells can use to regulate their mechanical  
344 properties during morphogenesis and development.

345 **Methods**

346 **Cell culture and transfection**

347 NIH 3T3 fibroblasts (American Type Culture Collection, Manassas, VA) were cultured in DMEM media  
348 (Mediatech, Herndon, VA) and supplemented with 10% FBS (HyClone; ThermoFisher Scientific,  
349 Hampton, NH), 2 mM L-glutamine (Invitrogen, Carlsbad, CA) and penicillin-streptomycin (Invitrogen).  
350 Zyxin<sup>-/-</sup> and zyxin<sup>-/-</sup>+EGFP-zyxin Mouse Embryonic Fibroblast cells were a gift of Mary Beckerle's lab  
351 (University of Utah, Salt Lake City, UT) and cultured similarly to the NIH 3T3 fibroblasts<sup>59</sup>. Cells were  
352 tested for mycoplasma and were free of contamination. All cells were transiently transfected via  
353 electroporation 24 hrs prior to experiment using a Neon Transfection system (ThermoFisher Scientific).  
354 Following transfection, cells were plated on glass coverslips and imaged the next day.

355

356 **Drug treatments**

357 Cells were treated with either the 10 μM SMIFH2 a pan-formin inhibitor<sup>38</sup> or 1μM of Y-27632 which  
358 inhibits ROCK (ThermoFisher Scientific), for at least 30 minutes prior to imaging.

359

360 **Plasmids**

361 The optogenetic membrane tether consisting of Stargazin-GFP-LOVpep and prGEF constructs used are  
362 previously described (Wagner 2016). prGEF-YFP was constructed in an identical manner to prGEF with  
363 YFP replacing mCherry. This construct was used in experiments where the effects on various  
364 downstream markers were visualized. To examine effects on the actin and myosin networks, we used  
365 mApple-Actin and mApple-MLC constructs (gifts from M Davidson, University of Florida, Gainesville FL),  
366 mCherry-Vinculin (gift from V Weaver, University of California at San Francisco, San Francisco, CA) and  
367 mCherry-zyxin (gift from M Beckerle, University of Utah, Salt Lake City, UT).

368

369 **Live cell imaging**

370 Glass coverslips were placed in a ChamSlide magnetic chamber (Live Cell Instrument, Seoul, Korea) in  
371 culture media supplemented with 10 mM HEPES and 30μL/mL Oxyrase (Oxyrase Inc., Mansfield, OH)  
372 and maintained at 37°C. Cells were imaged on an inverted Nikon Ti-E microscope (Nikon, Melville, NY)  
373 with a Yokogawa CSU-X confocal scanhead (Yokogawa Electric, Tokyo, Japan), and laser merge module

374 containing 491nm, 561nm, and 642nm laser lines (Spectral Applied Research, Ontario, Canada). Images  
375 were collected on either a CoolSNAP HQ2 CCD (Roper Scientific, Trenton, NJ) or Zyla 4.2 sCMOS  
376 Camera (Andor, Belfast, United Kingdom). Local recruitment using the optogenetic probe was  
377 performed using a 405 nM laser coupled to a Mosaic digital micromirror device (Andor). Images were  
378 collected using a 60x 1.49 NA ApoTIRF oil immersion objective (Nikon). All hardware was controlled  
379 using MetaMorph Automation and Image Analysis Software (Molecular Devices, Sunnyvale, CA).

380

381 Unless otherwise stated, cells were imaged in the 561 channel every 20 s for 45 min, with the first 15  
382 min used to determine the steady state of the system, the second 15 min to perform local recruitment,  
383 and the final 15 min to record any recovery. During recruitment a local region drawn in MetaMorph  
384 was illuminated by the 405nm laser for 960 ms at a power  $< 1 \mu\text{J/s}$  immediately prior to the acquisition  
385 of each 561 image.

386

### 387 **Local recruitment analysis**

388 All data analysis was performed using MATLAB (Mathworks, Natick, MA). Regions of interest (ROIs)  
389 were drawn to calculate the average intensity in the local recruitment region, a control area within the  
390 cell but far away from the recruitment area, and a background area outside of the cell. The average  
391 background intensity was subtracted from the control region and this curve was used to determine a  
392 photobleaching correction. The photobleaching correction was then applied to the background  
393 subtracted average intensity in the local recruitment region and normalized to the average value of the  
394 first 15 min of the data.

395

### 396 **Focal adhesion analysis**

397 Images were thresholded and segmented to create binary masks using MATLAB. Adhesion masks were  
398 filtered to exclude adhesions smaller than  $0.4 \mu\text{m}^2$  due to the inability to segment them consistently.  
399 The binary mask was then used to calculate the total number and average fluorescence intensity of  
400 adhesions in each frame. These masks were also used to calculate the average stress under the  
401 adhesions. To calculate the percentage of adhesions which increased in intensity or stress during  
402 activation, we compared the maximum intensity of the adhesion during activation to the intensity

403 immediately prior to activation. Adhesions were considered to have shown an increase in either  
404 intensity or stress if the magnitude of the increase was greater than 10%.

405

#### 406 **Kymograph and local displacement analysis**

407 Kymographs were created in MATLAB by drawing lines along stress fibers and averaging across a width  
408 of 9 pixels. Local displacement was determined by locating a feature 5 $\mu$ m from the edge of the  
409 activation zone in a kymograph immediately prior to activation. The location of this feature was then  
410 tracked and recorded following the 15 minute period of activation, and then again following 15  
411 minutes of relaxation.

412

#### 413 **Cytoskeletal flow analysis**

414 Images were first corrected for bleaching and then filtered with a 3D Gaussian filter to remove noise.  
415 Flow fields were calculated using an implementation of the Brox et al. optical flow algorithm<sup>49,50</sup> that  
416 ensures spatial and temporal smoothness. Flow field kymographs were generated by projecting the  
417 flow vectors onto the line defining the kymograph. To compare the direction of flow with the  
418 organization of the cytoskeleton, the local orientation of actin fibers was extracted from the structure  
419 tensor<sup>75</sup>.

420

#### 421 **$\alpha$ -actinin spacing analysis**

422 Kymographs were drawn as above. For each timepoint in the kymograph, local peaks in the linescan  
423 were determined. Peaks were then connected to create tracks across the kymograph. Local velocity  
424 was determined by isolating the section of the track during the activation period and fitting the  
425 trajectory to a straight line. The fitted slope was taken as the velocity.

426

#### 427 **Traction force microscopy**

428 Traction force microscopy was performed as described previously<sup>40,41,44</sup>. Briefly, polyacrylamide gels  
429 embedded with 40-nm fluorescent microspheres (Invitrogen) were polymerized on activated glass  
430 coverslips. The shear modulus of the gels used in these experiments was 8.6 kPa. Following  
431 polymerization gels were washed with PBS and crosslinked with the extracellular matrix protein



432 fibronectin (Millipore, Billerica, MA) using the photoactivatable crosslinker sulfo-sanpah (Thermo  
433 Fisher Scientific). Cells were plated and allowed to spread for at least 4 hours prior to imaging as  
434 described above.

435

436 Following imaging, cells were removed from the substrate using 0.5% sodium dodecyl sulfate and a  
437 reference image of the fluorescent beads in the unstrained substrate was taken. The image stack was  
438 then aligned to correct for drift and compared to the reference image using particle imaging  
439 velocimetry to create a displacement field with a grid spacing of 0.86  $\mu\text{m}$ . Displacement vectors were  
440 filtered and interpolated using the Kriging interpolation method. Traction stresses were reconstructed  
441 via Fourier Transform Traction Cytometry<sup>40,76</sup>, with a regularization parameter chosen by minimizing  
442 the L2 curve<sup>41</sup>. The strain energy was calculated as one half the integral of the traction stress field  
443 dotted into the displacement field<sup>44</sup>.

444

#### 445 **Statistical analysis**

446 All experiments were repeated a minimum of 3 times. Cells presented in figures are representative  
447 samples of the population behavior. Box plots represent the 25<sup>th</sup>, 50<sup>th</sup> and 75<sup>th</sup> percentiles of the data.  
448 Whiskers on the boxplot extend to the most extreme data points not considered outliers. Error bars  
449 represent the standard deviation, except where noted otherwise. Statistical significance was  
450 determined using independent two-sample Student's *t* tests of the mean to compare groups of data.  
451 Statistical significance is indicated by asterisks: (\*) represents a *p*-value < 0.05; (\*\*) represents a *p*-  
452 value < 0.01.

453

#### 454 **Code availability**

455 Matlab analysis routines can be made available upon request to the corresponding author.

456

#### 457 **Data availability**

458 The data that support the findings of this study are available from the corresponding author upon  
459 reasonable request. Stargazin-GFP-LOVpep and prGEF plasmids are available on addgene.

460

461 References:

- 462 1. Lecuit, T., Lenne, P.-F. & Munro, E. Force generation, transmission, and integration during cell  
463 and tissue morphogenesis. *Annu Rev Cell Dev Biol* **27**, 157–184 (2011).
- 464 2. Paluch, E. & Heisenberg, C.-P. Biology and Physics of Cell Shape Changes in Development.  
465 *Current Biology* **19**, R790–R799 (2009).
- 466 3. Iskratsch, T., Wolfenson, H. & Sheetz, M. P. Appreciating force and shape—the rise of  
467 mechanotransduction in cell biology. *Nat Rev Mol Cell Biol* **15**, 825–833 (2014).
- 468 4. Murrell, M., Oakes, P. W., Lenz, M. & Gardel, M. L. Forcing cells into shape: the mechanics of  
469 actomyosin contractility. *Nat Rev Mol Cell Biol* **16**, 486–498 (2015).
- 470 5. Martin, A. C., Gelbart, M., Fernandez-Gonzalez, R., Kaschube, M. & Wieschaus, E. F. Integration  
471 of contractile forces during tissue invagination. *J Cell Biol* **188**, 735–749 (2010).
- 472 6. Wagner, E. & Glotzer, M. Local RhoA activation induces cytokinetic furrows independent of  
473 spindle position and cell cycle stage. *J Cell Biol* **213**, 641–649 (2016).
- 474 7. Melvin, A. T., Welf, E. S., Wang, Y., Irvine, D. J. & Haugh, J. M. In chemotaxing fibroblasts, both  
475 high-fidelity and weakly biased cell movements track the localization of PI3K signaling. *Biophys J*  
476 **100**, 1893–1901 (2011).
- 477 8. Plotnikov, S. V. & Waterman, C. M. Guiding cell migration by tugging. *Curr Opin Cell Biol* **25**, 619–  
478 626 (2013).
- 479 9. McBeath, R., Pirone, D. M., Nelson, C. M., Bhadriraju, K. & Chen, C. S. Cell shape, cytoskeletal  
480 tension, and RhoA regulate stem cell lineage commitment. *Dev Cell* **6**, 483–495 (2004).
- 481 10. Wang, A. *et al.* Nonmuscle myosin II isoform and domain specificity during early mouse  
482 development. *Proc. Natl. Acad. Sci. U.S.A.* **107**, 14645–14650 (2010).
- 483 11. Müller, T. *et al.* Non-muscle myosin IIA is required for the development of the zebrafish  
484 glomerulus. *Kidney Int.* **80**, 1055–1063 (2011).
- 485 12. Schwarz, U. S. & Gardel, M. L. United we stand - integrating the actin cytoskeleton and cell-  
486 matrix adhesions in cellular mechanotransduction. *J Cell Sci* **125**, 3051–3060 (2012).
- 487 13. Blanchoin, L., Boujemaa-Paterski, R., Sykes, C. & Plastino, J. Actin dynamics, architecture, and  
488 mechanics in cell motility. *Physiol Rev* **94**, 235–263 (2014).
- 489 14. Fletcher, D. A. & Mullins, R. D. Cell mechanics and the cytoskeleton. *Nature* **463**, 485–492  
490 (2010).
- 491 15. Hotulainen, P. & Lappalainen, P. Stress fibers are generated by two distinct actin assembly  
492 mechanisms in motile cells. *J Cell Biol* **173**, 383–394 (2006).
- 493 16. Devreotes, P. & Horwitz, A. R. Signaling Networks that Regulate Cell Migration. *Cold Spring Harb*  
494 *Perspect Biol* **7**, a005959 (2015).
- 495 17. Gardel, M. L., Schneider, I. C., Aratyn-Schaus, Y. & Waterman, C. M. Mechanical integration of  
496 actin and adhesion dynamics in cell migration. *Annu Rev Cell Dev Biol* **26**, 315–333 (2010).
- 497 18. Hoffman, B. D. & Crocker, J. C. Cell mechanics: dissecting the physical responses of cells to force.  
498 *Annu Rev Biomed Eng* **11**, 259–288 (2009).
- 499 19. Stricker, J., Falzone, T. & Gardel, M. L. Mechanics of the F-actin cytoskeleton. *J Biomech* **43**, 9–14  
500 (2010).
- 501 20. Zhu, C., Bao, G. & Wang, N. Cell mechanics: mechanical response, cell adhesion, and molecular  
502 deformation. *Annu Rev Biomed Eng* **2**, 189–226 (2000).
- 503 21. Prost, J., Julicher, F. & Joanny, J.-F. Active gel physics. *Nature Physics* **11**, 111–117 (2015).

- 504 22. Schwarz, U. S. & Safran, S. A. Physics of adherent cells. *Rev Mod Phys* **85**, 1327 (2013).
- 505 23. Broedersz, C. P. & Mackintosh, F. C. Modeling semiflexible polymer networks. *Rev Mod Phys* **86**,
- 506 995 (2014).
- 507 24. Fritzsche, M., Lewalle, A., Duke, T., Kruse, K. & Charras, G. Analysis of turnover dynamics of the
- 508 submembranous actin cortex. *Mol Biol Cell* **24**, 757–767 (2013).
- 509 25. Saha, A. *et al.* Determining Physical Properties of the Cell Cortex. *Biophys J* **110**, 1421–1429
- 510 (2016).
- 511 26. Hu, S. *et al.* Long-range self-organization of cytoskeletal myosin II filament stacks. *Nat Cell Biol*
- 512 (2017). doi:10.1038/ncb3466
- 513 27. Ridley, A. J. & Hall, A. The small GTP-binding protein rho regulates the assembly of focal
- 514 adhesions and actin stress fibers in response to growth factors. *Cell* **70**, 389–399 (1992).
- 515 28. Chrzanoska-Wodnicka, M. & Burridge, K. Rho-stimulated contractility drives the formation of
- 516 stress fibers and focal adhesions. *J Cell Biol* **133**, 1403–1415 (1996).
- 517 29. Machacek, M. *et al.* Coordination of Rho GTPase activities during cell protrusion. *Nature* **461**,
- 518 99–103 (2009).
- 519 30. Pertz, O., Hodgson, L., Klemke, R. L. & Hahn, K. M. Spatiotemporal dynamics of RhoA activity in
- 520 migrating cells. *Nature* **440**, 1069–1072 (2006).
- 521 31. Wu, Y. I. *et al.* A genetically encoded photoactivatable Rac controls the motility of living cells.
- 522 *Nature* **461**, 104–108 (2009).
- 523 32. Weitzman, M. & Hahn, K. M. Optogenetic approaches to cell migration and beyond. *Curr Opin*
- 524 *Cell Biol* **30**, 112–120 (2014).
- 525 33. Wu, J. *et al.* Actomyosin pulls to advance the nucleus in a migrating tissue cell. *Biophys J* **106**, 7–
- 526 15 (2014).
- 527 34. Valon, L., Marín-Llauradó, A., Wyatt, T., Charras, G. & Trepát, X. Optogenetic control of cellular
- 528 forces and mechanotransduction. *Nat Commun* **8**, 14396 (2017).
- 529 35. Strickland, D. *et al.* TULIPs: tunable, light-controlled interacting protein tags for cell biology. *Nat*
- 530 *Methods* **9**, 379–384 (2012).
- 531 36. Guilluy, C. *et al.* The Rho GEFs LARG and GEF-H1 regulate the mechanical response to force on
- 532 integrins. *Nat Cell Biol* **13**, 722–727 (2011).
- 533 37. Jaiswal, M. *et al.* Mechanistic insights into specificity, activity, and regulatory elements of the
- 534 regulator of G-protein signaling (RGS)-containing Rho-specific guanine nucleotide exchange
- 535 factors (GEFs) p115, PDZ-RhoGEF (PRG), and leukemia-associated RhoGEF (LARG). *J Biol Chem*
- 536 **286**, 18202–18212 (2011).
- 537 38. Rizvi, S. A. *et al.* Identification and characterization of a small molecule inhibitor of formin-
- 538 mediated actin assembly. *Chem Biol* **16**, 1158–1168 (2009).
- 539 39. Balaban, N. Q. *et al.* Force and focal adhesion assembly: a close relationship studied using elastic
- 540 micropatterned substrates. *Nat Cell Biol* **3**, 466–472 (2001).
- 541 40. Sabass, B., Gardel, M., Waterman, C. M. & Schwarz, U. S. High resolution traction force
- 542 microscopy based on experimental and computational advances. *Biophys J* **94**, 207–220 (2008).
- 543 41. Soiné, J. R. D. *et al.* Model-based Traction Force Microscopy Reveals Differential Tension in
- 544 Cellular Actin Bundles. *PLoS Comput Biol* **11**, e1004076 (2015).
- 545 42. Stricker, J., Aratyn-Schaus, Y., Oakes, P. W. & Gardel, M. L. Spatiotemporal constraints on the
- 546 force-dependent growth of focal adhesions. *Biophys J* **100**, 2883–2893 (2011).
- 547 43. Oakes, P. W., Beckham, Y., Stricker, J. & Gardel, M. L. Tension is required but not sufficient for

- 548 focal adhesion maturation without a stress fiber template. *J Cell Biol* **196**, 363–374 (2012).
- 549 44. Oakes, P. W., Banerjee, S., Marchetti, M. C. & Gardel, M. L. Geometry regulates traction stresses  
550 in adherent cells. *Biophys J* **107**, 825–833 (2014).
- 551 45. Brown, R. A., Prajapati, R., McGrouther, D. A., Yannas, I. V. & Eastwood, M. Tensional  
552 homeostasis in dermal fibroblasts: mechanical responses to mechanical loading in three-  
553 dimensional substrates. *J Cell Physiol* **175**, 323–332 (1998).
- 554 46. Ingber, D. E. Tensegrity I. Cell structure and hierarchical systems biology. *J Cell Sci* **116**, 1157–  
555 1173 (2003).
- 556 47. Webster, K. D., Ng, W. P. & Fletcher, D. A. Tensional Homeostasis in Single Fibroblasts. *Biophys J*  
557 **107**, 146–155 (2014).
- 558 48. Turlier, H., Audoly, B., Prost, J. & Joanny, J.-F. Furrow constriction in animal cell cytokinesis.  
559 *Biophys J* **106**, 114–123 (2014).
- 560 49. Brox, T., Bruhn, A., Papenberg, N. & Weickert, J. in *Computer Vision - ECCV 2004* 25–36 (Springer  
561 Berlin Heidelberg, 2004). doi:10.1007/978-3-540-24673-2\_3
- 562 50. Sánchez, J., Monzón, N. & Salgado, A. Robust Optical Flow Estimation. *Image Processing On Line*  
563 **3**, 252–270 (2013).
- 564 51. Cai, Y. *et al.* Cytoskeletal coherence requires myosin-IIA contractility. *J Cell Sci* **123**, 413–423  
565 (2010).
- 566 52. Xu, K., Babcock, H. P. & Zhuang, X. Dual-objective STORM reveals three-dimensional filament  
567 organization in the actin cytoskeleton. *Nat Methods* **9**, 185–188 (2012).
- 568 53. Colombelli, J. *et al.* Mechanosensing in actin stress fibers revealed by a close correlation  
569 between force and protein localization. *J Cell Sci* **122**, 1665–1679 (2009).
- 570 54. Yoshigi, M., Hoffman, L. M., Jensen, C. C., Yost, H. J. & Beckerle, M. C. Mechanical force mobilizes  
571 zyxin from focal adhesions to actin filaments and regulates cytoskeletal reinforcement. *J Cell Biol*  
572 **171**, 209–215 (2005).
- 573 55. Zaidel-Bar, R., Ballestrem, C., Kam, Z. & Geiger, B. Early molecular events in the assembly of  
574 matrix adhesions at the leading edge of migrating cells. *J Cell Sci* **116**, 4605–4613 (2003).
- 575 56. Smith, M. A. *et al.* LIM domains target actin regulators paxillin and zyxin to sites of stress fiber  
576 strain. *PLoS ONE* **8**, e69378 (2013).
- 577 57. Smith, M. A., Hoffman, L. M. & Beckerle, M. C. LIM proteins in actin cytoskeleton  
578 mechanoreponse. *Trends Cell Biol* **24**, 575–583 (2014).
- 579 58. Hoffman, L. M. *et al.* Genetic ablation of zyxin causes Mena/VASP mislocalization, increased  
580 motility, and deficits in actin remodeling. *J Cell Biol* **172**, 771–782 (2006).
- 581 59. Smith, M. A. *et al.* A zyxin-mediated mechanism for actin stress fiber maintenance and repair.  
582 *Dev Cell* **19**, 365–376 (2010).
- 583 60. Guo, W.-H. & Wang, Y.-L. Retrograde fluxes of focal adhesion proteins in response to cell  
584 migration and mechanical signals. *Mol Biol Cell* **18**, 4519–4527 (2007).
- 585 61. Kanchanawong, P. *et al.* Nanoscale architecture of integrin-based cell adhesions. *Nature* **468**,  
586 580–584 (2010).
- 587 62. Uemura, A., Nguyen, T.-N., Steele, A. N. & Yamada, S. The LIM domain of zyxin is sufficient for  
588 force-induced accumulation of zyxin during cell migration. *Biophys J* **101**, 1069–1075 (2011).
- 589 63. Aratyn-Schaus, Y., Oakes, P. W. & Gardel, M. L. Dynamic and structural signatures of lamellar  
590 actomyosin force generation. *Mol Biol Cell* **22**, 1330–1339 (2011).
- 591 64. Jungbauer, S., Gao, H., Spatz, J. P. & Kemkemer, R. Two characteristic regimes in frequency-

- 592 dependent dynamic reorientation of fibroblasts on cyclically stretched substrates. *Biophys J* **95**,  
593 3470–3478 (2008).
- 594 65. Livne, A., Bouchbinder, E. & Geiger, B. Cell reorientation under cyclic stretching. *Nat Commun* **5**,  
595 3938 (2014).
- 596 66. De, R., Zemel, A. & Safran, S. A. Dynamics of cell orientation. *Nat Phys* **3**, 655–659 (2007).
- 597 67. Kumar, S. *et al.* Viscoelastic retraction of single living stress fibers and its impact on cell shape,  
598 cytoskeletal organization, and extracellular matrix mechanics. *Biophys J* **90**, 3762–3773 (2006).
- 599 68. Russell, R. J., Xia, S.-L., Dickinson, R. B. & Lele, T. P. Sarcomere mechanics in capillary endothelial  
600 cells. *Biophys J* **97**, 1578–1585 (2009).
- 601 69. Kassianidou, E., Brand, C. A., Schwarz, U. S. & Kumar, S. Geometry and network connectivity  
602 govern the mechanics of stress fibers. *Proc. Natl. Acad. Sci. U.S.A.* **114**, 2622–2627 (2017).
- 603 70. Russell, R. J. *et al.* Sarcomere length fluctuations and flow in capillary endothelial cells.  
604 *Cytoskeleton (Hoboken)* **68**, 150–156 (2011).
- 605 71. Callan-Jones, A. C. & Voituriez, R. Active gel model of amoeboid cell motility. *New J Phys* **15**,  
606 025022 (2013).
- 607 72. Edwards, C. M. & Schwarz, U. S. Force localization in contracting cell layers. *Phys Rev Lett* **107**,  
608 128101 (2011).
- 609 73. Farsad, M. & Vernerey, F. J. An XFEM-based numerical strategy to model mechanical  
610 interactions between biological cells and a deformable substrate. *Int J Numer Meth Engng* **92**,  
611 238–267 (2012).
- 612 74. Bischofs, I. & Schwarz, U. Cell organization in soft media due to active mechanosensing. **100**,  
613 9274–9279 (2003).
- 614 75. Weichsel, J., Urban, E., Small, J. V. & Schwarz, U. S. Reconstructing the orientation distribution of  
615 actin filaments in the lamellipodium of migrating keratocytes from electron microscopy  
616 tomography data. *Cytometry A* **81**, 496–507 (2012).
- 617 76. Butler, J. P., Tolić-Nørrelykke, I. M., Fabry, B. & Fredberg, J. J. Traction fields, moments, and  
618 strain energy that cells exert on their surroundings. *Am J Physiol Cell Physiol* **282**, C595–605  
619 (2002).
- 620
- 621

622 **Acknowledgements**

623 E.K.W. was supported by NIGMS T32 GM007183. C.A.B. and U.S.S. acknowledge support by the  
624 Heidelberg Karlsruhe Research Partnership (HEIKA). U.S.S. is a member of the cluster of excellence  
625 CellNetworks and the Interdisciplinary Center for Scientific Computing at Heidelberg. This work was  
626 also supported by NIGMS GM085087 to M.G. and NIH R01-GM104032 to M.L.G.

627

628 **Author Contributions**

629 P.W.O, E.K.W, M.G. and M.L.G conceived the study and designed the experiments. P.W.O and E.K.W.  
630 performed experiments. P.W.O. and M.L. performed data analysis. E.K.W. designed and cloned the  
631 molecular constructs. C.A.B., D.P., M.L. and U.S.S. conceived and designed the theoretical model. C.A.B.  
632 and D.P. performed simulations. P.W.O., M.G. U.S.S. and M.L.G. wrote the manuscript with feedback  
633 from all authors.

634

635 **Competing Interests**

636 The authors declare no competing financial interests.

637

638 **Figure Captions**

639 **Figure 1**

640 RhoA activity can be spatiotemporally controlled via an optogenetic probe. **(a)** Spatiotemporal control  
641 of RhoA activity is achieved using an optogenetic probe to recruit the RhoA specific GEF LARG to the  
642 plasma membrane. A LOVpep molecule is anchored to the membrane via fusion to the transmembrane  
643 protein Stargazin, while a protein consisting of tandem PDZ domains fused to the DH domain of LARG  
644 (prGEF) is distributed throughout the cytosol. Upon stimulation with 405nm light, the LOVpep  
645 undergoes a conformational change exposing a high-affinity binding site which drives the prGEF to the  
646 membrane where it can activate RhoA. When the activating light is removed, the LOVpep undergoes a  
647 thermodynamically driven refolding halting further recruitment of prGEF. **(b)** The RhoA signaling  
648 pathway. RhoA\*GTP activates both Dia and ROCK, which in turn promote actin polymerization and  
649 myosin II activation, respectively. **(c)** Representative images of a 3T3 fibroblast expressing an mCherry-  
650 tagged version of prGEF. Upon local activation (top row – orange box) mCherry-prGEF rapidly  
651 accumulates in the activation region. Removal of the activating light (bottom row) results in the  
652 accumulated mCherry-prGEF dispersing back into the cytosol. **(d)** Quantification of the local intensity  
653 increase of mCherry-prGEF in the activation region of the cell shown in **c**. The activation period is  
654 indicated by a blue background. **(e-f)** Representative images of cells expressing either mApple-Actin **(e)**  
655 or mApple-Myosin Light Chain **(f)** prior to activation, following 15 minutes of activation in the region  
656 indicated, and following 15 minutes of relaxation. Both actin and myosin exhibit increases in intensity  
657 in the local region of activation. **(g)** Quantification of the local intensity increase of actin and myosin  
658 from the cells in **e-f**. Both signals begin increasing immediately upon RhoA activation, and dissipate as  
659 soon as the activating light is switched off. **(h)** Mean maximum intensity fold-increase of actin (n=6) or  
660 myosin (n=11) in regions of activation in control cells, or cells treated with 10  $\mu$ M SMIFH2 (Dia  
661 inhibitor; n = 7) or 1 $\mu$ M Y-27632 (ROCK inhibitor; n=6). Inhibition of either Dia or ROCK results in  
662 reduced average increases in local intensity during RhoA activation. Time is min:sec.

663

664

665

666 **Figure 2**

667

668 Increased RhoA activity leads to increased cell contractility. **(a)** A cell expressing mCherry-Vinculin is  
669 shown prior to activation, after 15 minutes of activation, and after 15 minutes of relaxation. The  
670 activation region is indicated by the orange box. **(b)** The corresponding traction stress maps for the  
671 time series shown in **a**. **(c)** A plot showing the strain energy versus time and the number of focal  
672 adhesions versus time, with the activation period indicated by the blue background. The strain energy  
673 begins to increase immediately upon activation, and begins to relax as soon as the activating light is  
674 removed. In contrast, the number of focal adhesions remains relatively constant and does not respond  
675 to the local increase in RhoA activity. **(d)** The average stress and fluorescence intensity of a  
676 representative adhesion marked by the white box in **a**. Kymographs were generated by drawing a line  
677 along the long axis of the adhesion. The activation period is indicated by the orange bar above the  
678 kymograph. **(e)** A sequence of traction maps from a cell exposed to a series of activations in regions of  
679 different size. Time is hr:min:sec. **(f)** A plot of the experimental (black line) and theoretical (red line)  
680 strain energy vs time for the cell shown in **e**. The contractile response of the cell is proportional to the  
681 size of the activation region and retreats to a baseline value following each activation period. **(g)** A  
682 cartoon of the continuum model used to describe the cell in **e**. The model consists of a contractile  
683 element ( $\sigma_m$ ) in parallel to a viscous ( $\eta$ ) and an elastic element ( $k$ ), connected via a frictional elements  
684 ( $\gamma$ ) to an elastic substrate ( $k_M$ ).

685

### 686 **Figure 3**

687 Stress fibers direct contractile flow. **(a)** Fluorescence time series of a cell expressing mApple-MLC  
688 shown prior and after two separate periods of activation (orange boxes). **(b)** Flow fields of myosin  
689 calculated from the images in **a**. Flow is always directed along the direction of the stress fibers. **(c)** A  
690 two dimensional model of the cell was created using a triangular mesh of viscoelastic-cables ( $k, \eta$ )  
691 connected at vertices viscously coupled ( $\gamma$ ) to the environment. Stress fibers (blue line) consisting of  
692 contractile ( $\sigma_m$ ), viscous ( $\eta_{SF}$ ) and elastic elements ( $k_{SF}$ ) were embedded in the network. Using a  
693 simplified rectangular cell with this network, local RhoA activation could be simulated by activating  
694 force dipoles in network links in a region in the center of the cell. **(d)** To calibrate the 2D discrete  
695 model, the average flow (white box in **c**), was measured and compared to the 1D continuum model



696 presented above. **(e-f)** The 2D discrete model was used to explore two contractile scenarios: **(e)**  
697 contractile stress fibers (blue) embedded in a contractile mesh (grey); and **(f)** contractile stress fibers  
698 embedded in a non-contractile background. If both the stress fibers and mesh are contractile, a  
699 transverse contraction pinches together the stress fibers. If only the stress fibers contract, the flow  
700 profile is restricted to the orientation of the fibers, mimicking the experimental results.

701

#### 702 **Figure 4**

703 Stress fibers behave elastically. **(a)** Image showing a cell labeled with mApple-MLC. The activation  
704 regions are indicated by the orange boxes. **(b)** A kymograph drawn along the stress fiber (green line in  
705 **a**). During activation periods myosin flows towards the activation regions. **(c)** A kymograph created  
706 from the same region as **b** using the flow maps determined previously. Flow was projected onto the  
707 stress fiber and color coded to indicate speed and direction. This flow map illustrates that during  
708 relaxation periods, myosin flow reverses direction away from the activation periods. **(d)** A  
709 quantification of displacement of stress fibers during contraction and relaxation. Puncta  $\sim 5 \mu\text{m}$  from  
710 the activation zone were tracked and measured following 15 minutes of activation, and again following  
711 15 min of relaxation ( $n=41$  from 4 cells). Puncta translated about  $3 \mu\text{m}$  from their original position, and  
712 relaxed to  $\sim 1 \mu\text{m}$  from their original position elastically. The relaxation response could be further  
713 broken into two groups, one with a strong reversal ( $\sim 80\%$  of their original position) and one with a  
714 weak reversal ( $\sim 25\%$  of their original position). **(e)** A cell transfected with mApple- $\alpha$ -actinin. The  
715 activation area is indicated by the orange box. **(f)** A kymograph drawn along the direction indicated in  
716 **e**, overlain with tracks of the individual  $\alpha$ -actinin puncta during activation. **(g)** The velocity of individual  
717 puncta along the stress fiber is measured from the slope of the tracks and plotted against the distance  
718 from the activation region. Adjacent puncta all move at approximately the same speed. Sudden  
719 changes in velocity (blue arrowhead) correlate with what appear to be site of mechanical failure along  
720 the stress fiber and the appearance of new puncta. The black line represents the stress fiber from **f**,  
721 while the grey lines are other stress fibers from the same cell. **(h)** A representative kymograph is fit to  
722 both the 1D continuum and 2D discrete models. Both models are able to recapitulate the flow patterns  
723 seen experimentally.

724

725 **Figure 5**

726 Zyxin accumulates at sites of strain on stress fibers during local RhoA activation. **(a)** A NIH 3T3  
727 expressing mCherry-zyxin. The activation region is indicated by the orange box. **(b)** A kymograph of a  
728 representative adhesion marked by the white box in **a**. **(c)** The average intensity of zyxin in the  
729 activation region. **(d)** A kymograph illustrating the local zyxin accumulation during activation along the  
730 green line shown in **a**. **(e)** A zyxin<sup>(-/-)</sup> MEF expressing mApple-MLC before activation, at peak activation,  
731 and following relaxation. Myosin accumulates as in 3T3s. **(f)** A kymograph of myosin intensity and flow  
732 speed drawn along the green line indicated in **e**. Zyxin<sup>(-/-)</sup> MEFS exhibit little to no elastic flow reversal.  
733 **(g)** A zyxin<sup>(-/-)</sup> MEF rescued with EGFP-zyxin and expressing mApple-MLC, during an activation  
734 sequence. **(h)** A kymograph of myosin and flow illustrating a strong elastic flow reversal along the line  
735 drawn in **g**. **(i)** Displacement analysis of the zyxin<sup>(-/-)</sup> (n=40 from 3 cells) and zyxin<sup>(-/-)</sup>+EGFP-zyxin MEFs  
736 (n=18 from 3 cells). Without zyxin, cells do not exhibit an elastic response. **(j)** A kymograph  
737 representing the average fit of the continuum model to the zyxin<sup>(-/-)</sup> data. **(k)** A kymograph  
738 representing the average fit of the continuum model to the zyxin<sup>(-/-)</sup>+EGFP-zyxin data. **(l)** The elastic ( $E$ )  
739 and viscous ( $\eta$ ) parameters found from fitting the experimental kymographs to the continuum model  
740 (n=5 from 3 cells for condition). Without zyxin, the elasticity increases and the viscosity decreases.

741

742 **Figure 6**

743 Molecular and mechanical models of local RhoA activation in stress fibers. Molecular model: (1) Local  
744 recruitment of prGEF leads to activation of RhoA and accumulation of actin and myosin. The local  
745 increase in actin and myosin in turn stimulates a local contraction in the stress fiber. (2) The increased  
746 local contractility induces a flow of myosin and  $\alpha$ -actinin along the stress fiber towards the activation  
747 region. (3) Increased flow induces higher strain at both the interface coupling the stress fiber to the  
748 focal adhesion and the activation region, resulting in recruitment of the mechanosensitive protein  
749 zyxin. (4) When local activation of RhoA stops, the flow reverses direction as the stress fiber relaxes  
750 elastically. Mechanical model: The stress fiber is represented as a contractile element in parallel to  
751 viscous and elastic elements. Upon local activation of RhoA, the contractile element inside the  
752 activation region is compressed, leading to extension of both the viscous and elastic elements outside

753 the region. As local activation stops, the energy stored in the elastic element allows it to relax back to  
754 its original state, while the energy in the viscous element is lost.

755

756

757 **Supplementary Movie Captions**

758 **Supplementary Movie 1**

759 A NIH 3T3 fibroblast expressing mCherry-prGEF during a local activation of RhoA (from Figure 1c). Local  
760 activation area is indicated by the white box. Time is in min:sec.

761

762 **Supplementary Movie 2**

763 A NIH 3T3 fibroblast expressing mApple-Actin during local activation of RhoA (from Figure 1e). Local  
764 activation area is indicated by the white box. Time is in min:sec.

765

766 **Supplementary Movie 3**

767 A NIH 3T3 fibroblast expressing mApple-MLC during a local activation of RhoA (from Figure 1f). Local  
768 activation area is indicated by the white box. Time is in min:sec.

769

770 **Supplementary Movie 4**

771 A NIH 3T3 fibroblast expressing mCherry-vinculin during a local activation of RhoA (from Figure 2a) and  
772 the corresponding traction stress maps (from Figure 2b). Local activation is indicated by the white box.  
773 Time is in min:sec.

774

775 **Supplementary Movie 5**

776 Traction stress maps of a NIH 3T3 fibroblast during a series of local RhoA activations (from Figure 2e).  
777 Local activation is indicated by white boxes. Time is in hr:min:sec.

778

779 **Supplementary Movie 6**

780 A NIH 3T3 fibroblast expressing mApple-MLC during a local activation of RhoA and the corresponding  
781 cytoskeletal flow maps (from Figure 3a,b). Local activation is indicated by white boxes. Time is in

782 hr:min:sec.

783

784

785

786 **Supplementary Movie 7**

787 A NIH 3T3 fibroblast expressing mApple-MLC during 3 sequential local activations of RhoA. Each  
788 activation is the same area but of a different geometry. Local activation is indicated by white boxes.  
789 Time is in hr:min:sec.

790

791 **Supplementary Movie 8**

792 A NIH 3T3 fibroblast expressing mApple- $\alpha$ -actinin during a local activation of RhoA (from Figure 4e).  
793 Local activation is indicated by white boxes. Time is in min:sec.

794

795 **Supplementary Movie 9**

796 A NIH 3T3 fibroblast expressing mCherry-Zyxin during a local activation of RhoA (from Figure 5a). Local  
797 activation is indicated by white boxes. Time is in min:sec.

798

799 **Supplementary Movie 10**

800 A zyxin<sup>(-/-)</sup> Mouse Embryonic Fibroblast expressing mApple-MLC during a local activation of RhoA (from  
801 Figure 5e). Local activation is indicated by white boxes. Time is in min:sec.

802

803 **Supplementary Movie 11**

804 A zyxin<sup>(-/-)</sup>+EGFP-zyxin Mouse Embryonic Fibroblast expressing mApple-MLC during a local activation of  
805 RhoA (from Figure 5g). Local activation is indicated by white boxes. Time is in min:sec.

806

807 **Figure 1**

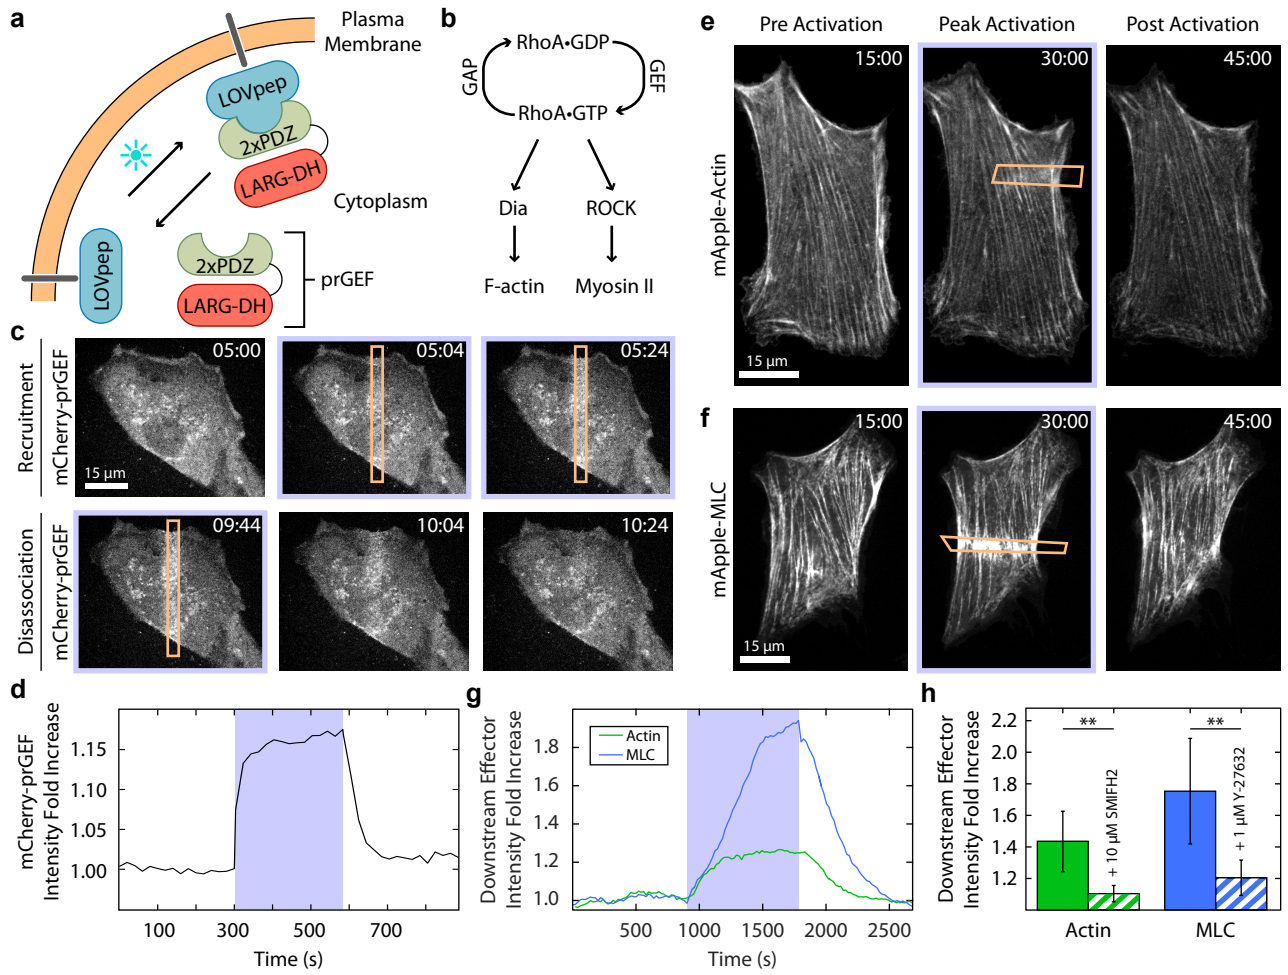

808

809

810 **Figure 2**

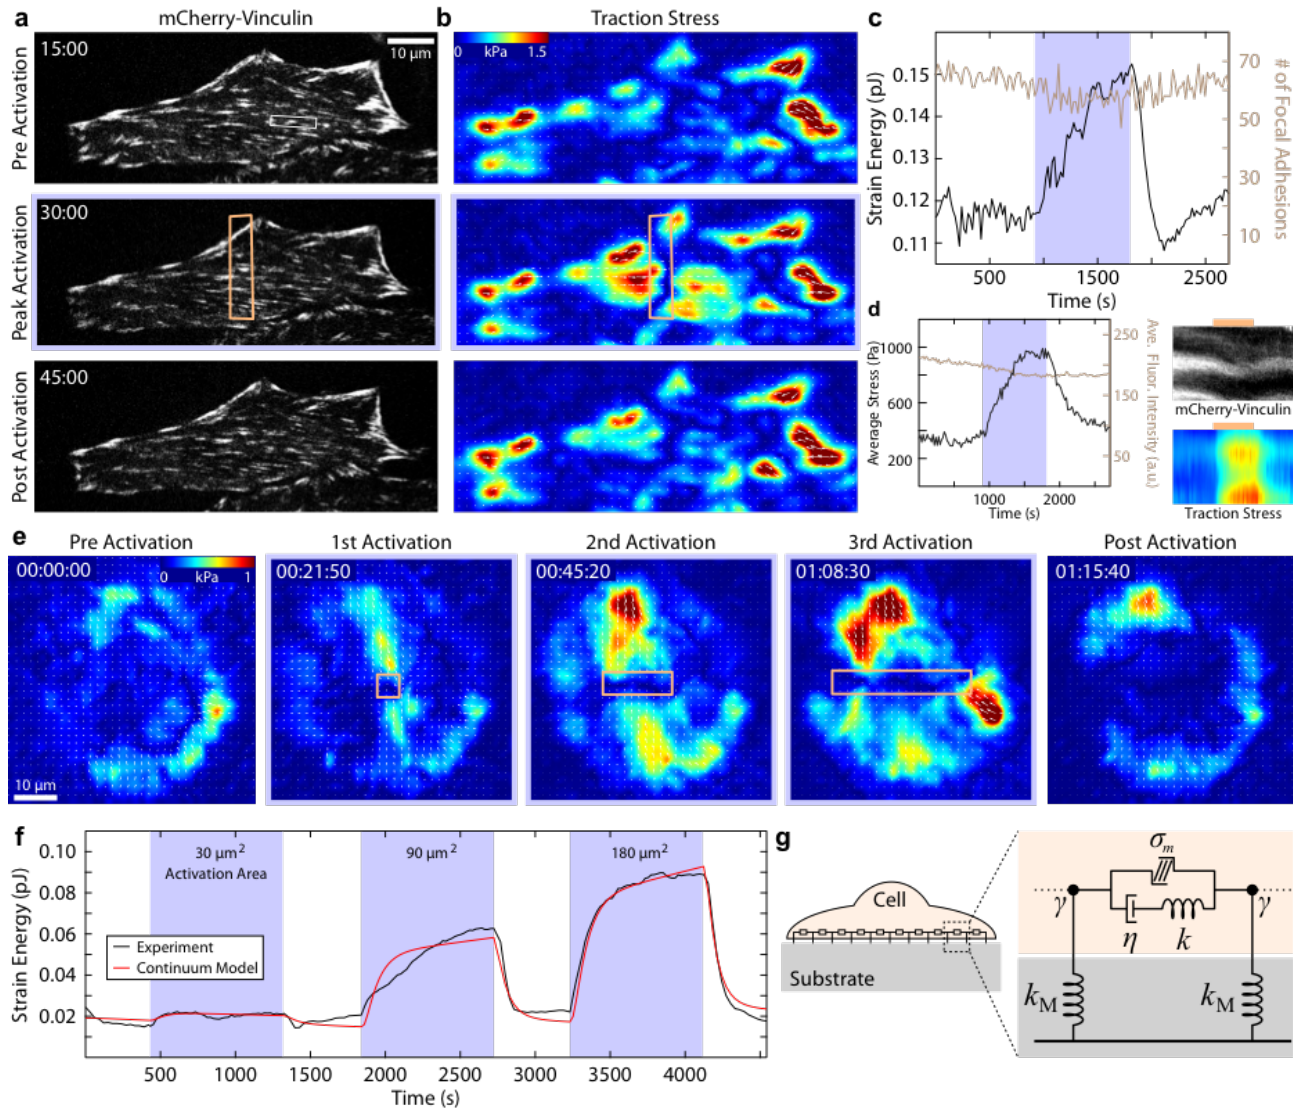

811

812

813 **Figure 3**

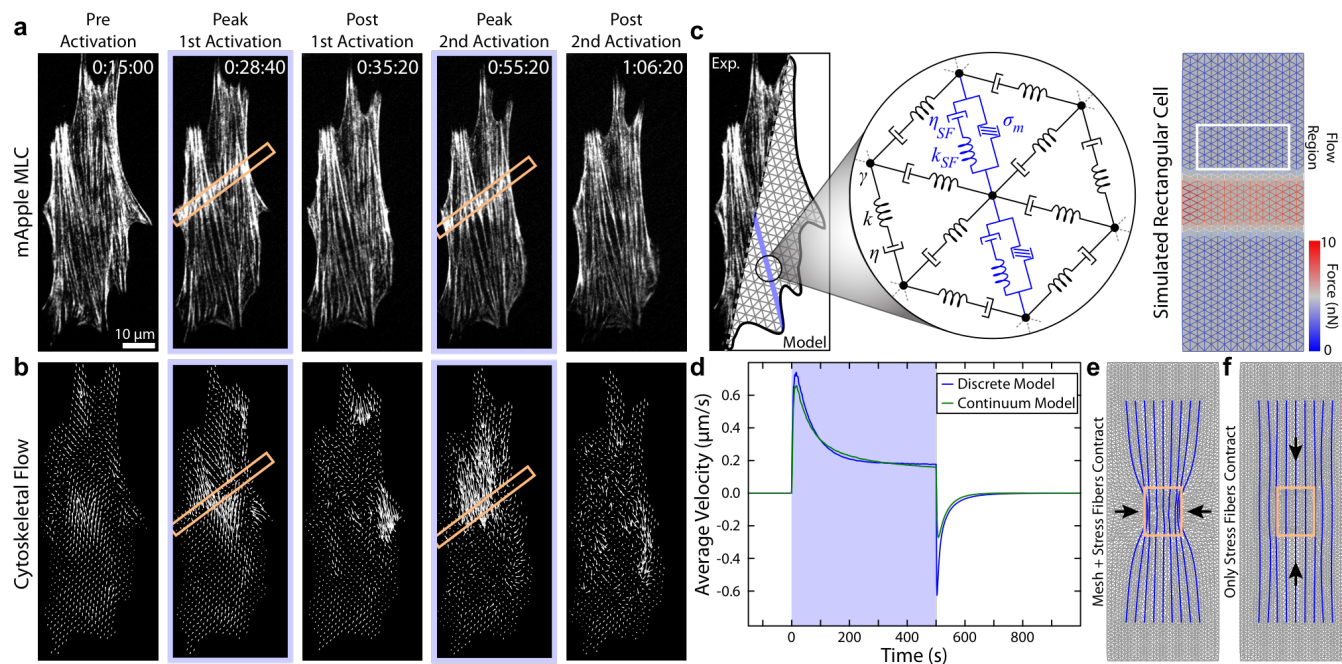

814

815



816 **Figure 4**

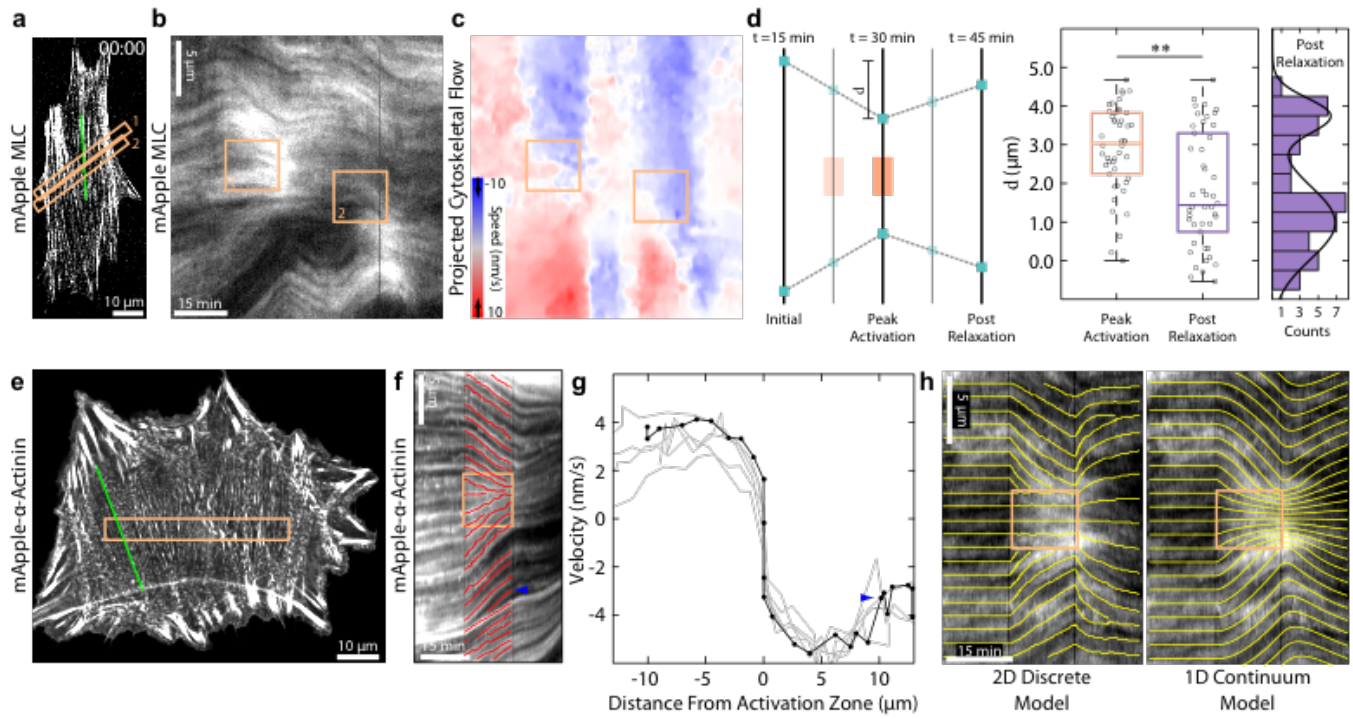

817

818

819 **Figure 5**

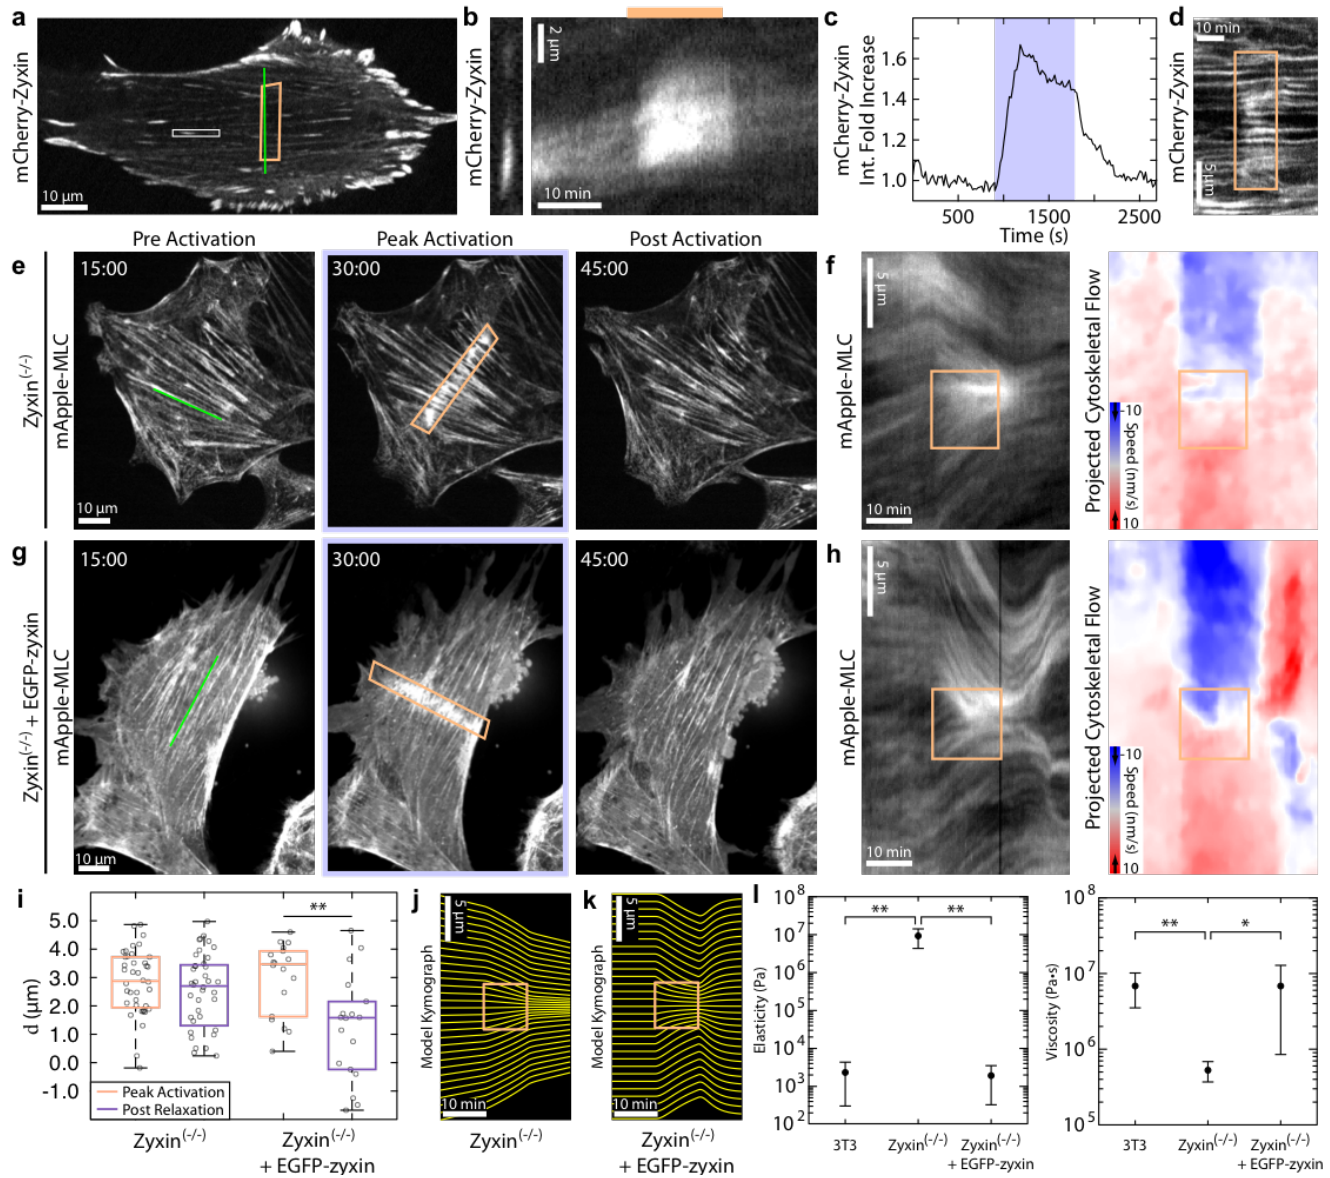

820

821

822 **Figure 6**

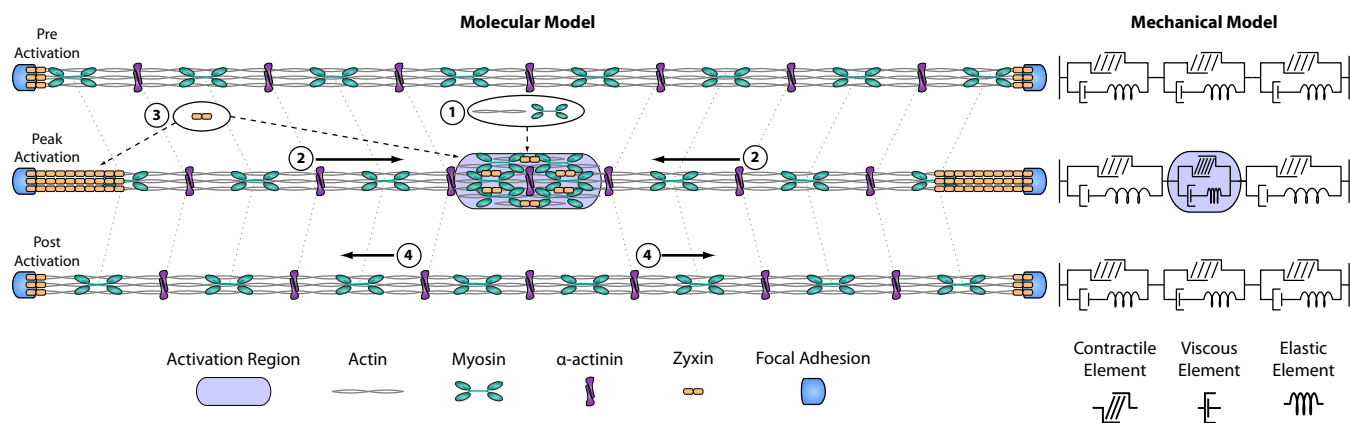

823
